# Supplementary material for: ABD-Derived Protein Blockers of Human IL-17 Receptor A as Non-IgG Alternatives for Modulation of IL-17-Dependent Pro-Inflammatory Axis
Source: PubMed Central journal article supplement (PMC6213189; doi:10.3390/ijms19103089), 2018-10-09
Supplement: ijms-19-03089-s001.pdf [file ijms-19-03089-s001.pdf]

# ABD-derived protein blockers of human IL-17 receptor A as non-IgG alternatives for modulation of IL-17-dependent pro-inflammatory axis

Marie Hlavničková, Milan Kuchař, Radim Osička, Lucie Vaňková, Hana Petroková, Michal Malý, Jiří Černý, Petr Arenberger and Petr Malý

## Supplementary Data

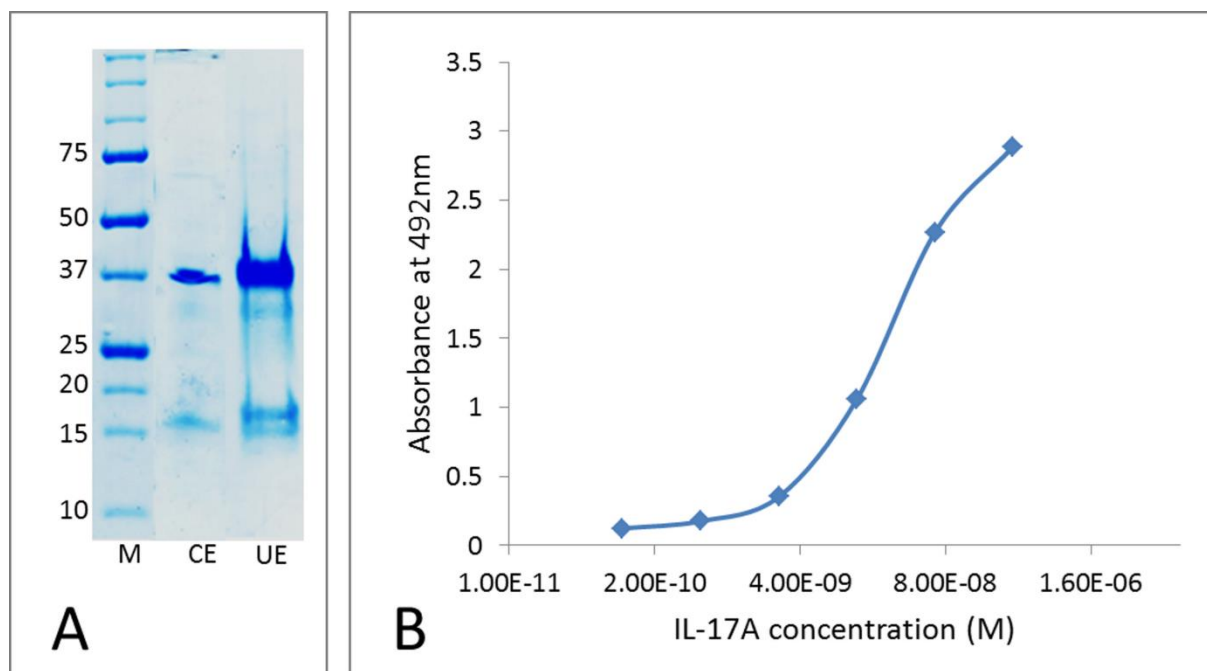

**Figure S1.** Production and functional verification of the recombinant IL-17RA receptor. (A) The recombinant IL-17RA protein was produced in *E. coli* SHuffle strain, purified on Ni-NTA-agarose chromatography and the purity of the protein was verified on SDS-PAGE (CE indicates a soluble protein purified from a cytosolic fraction, UE indicates protein purified from an urea extract). Recombinant product of 40 kDa was visualized on polyacrylamide gel. (B) Binding activity of recombinant IL-17RA produced in *E. coli* tested in ELISA. The protein purified on Ni-NTA agarose, eluted in 4 M urea and diluted in a coating buffer was immobilized in 96-well plate overnight. The human IL-17A protein was added in series of dilutions in phosphate buffer and its binding was detected using anti-human IL-17A rabbit polyclonal antibody followed by anti-rabbit IgG-HRP conjugate.

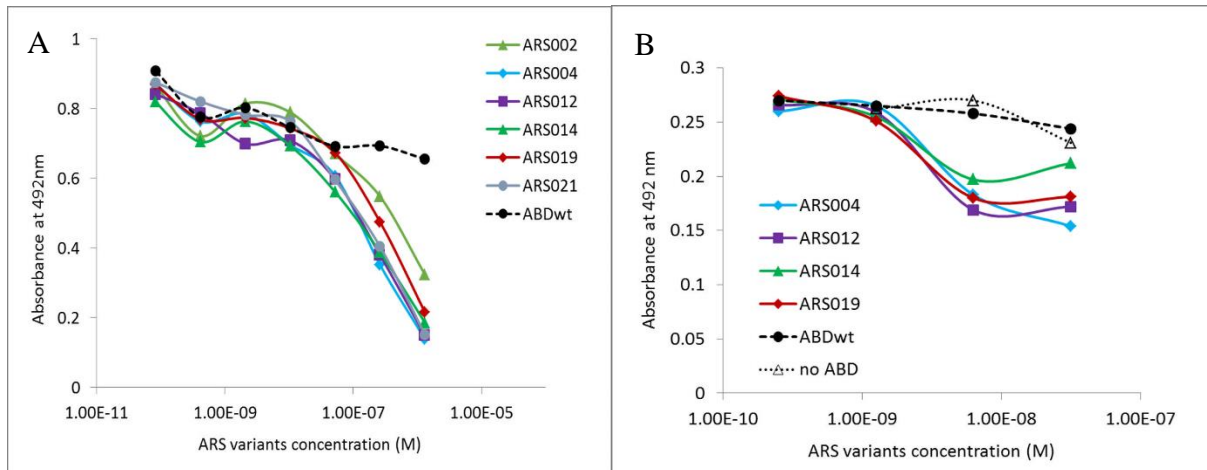

**Figure S2.** ARS ligands compete with IL-17A cytokine for binding to human recombinant IL-17RA (A) or IL-17RA-IgG chimera (B) in ELISA. IL-17RA produced in *E. coli* SHuffle host cells was immobilized on 96-well Polysorp plate. Serially diluted His<sub>6</sub>-ARS-TolA-AVI ligands were used to compete for binding with 10 nM of human IL-17A cytokine. Bound IL-17A was detected with anti-human IL-17A rabbit polyclonal antibody in combination with secondary anti-IgG-HRP conjugate. His<sub>6</sub>-ABDwt-TolA-AVI served as a negative control.

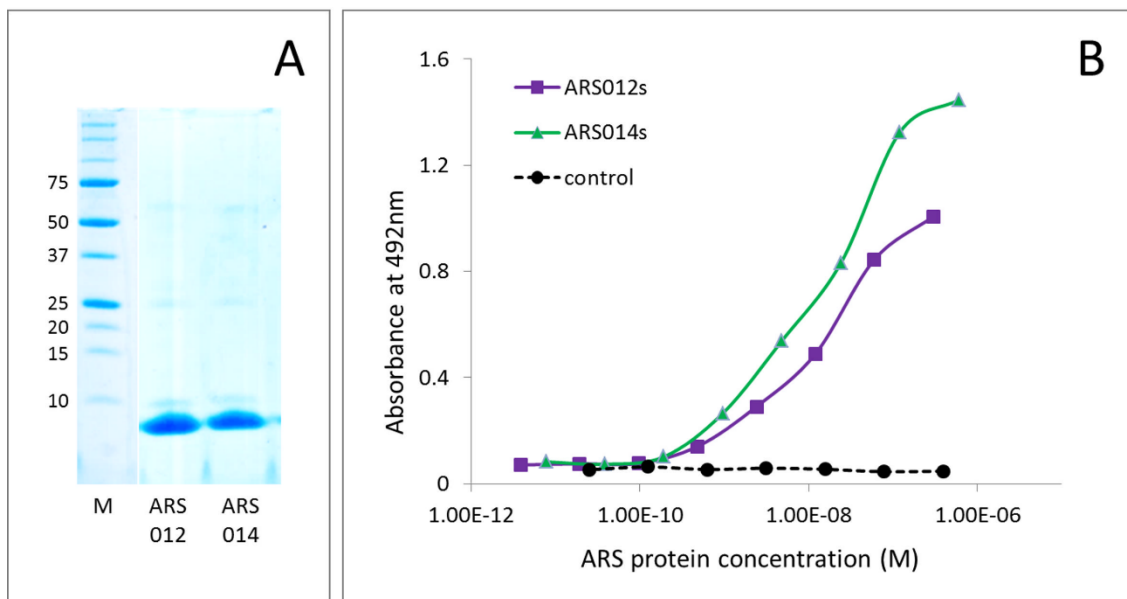

**Figure S3.** Generation and characterization of short ARS proteins. (A) Production of *in vivo* biotinylated His<sub>6</sub>-ARS-AviTag protein variants shown as stained bands of 8.3 kDa Ni-NTA-agarose purified proteins on SDS-PAGE. (B) Binding of biotinylated ARS012s and ARS014s proteins to immobilized recombinant IL-17RA, produced in *E. coli* SHuffle host cells, tested in ELISA using streptavidin-HRP conjugate. As a negative control, coated BSA in the absence of IL-17RA was used.

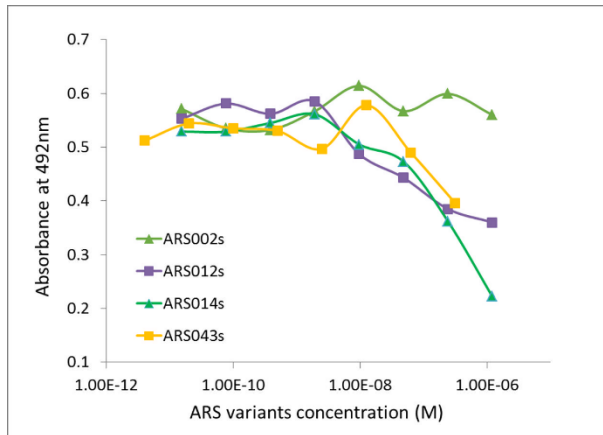

**Figure S4.** Short versions of ARS ligands inhibit binding of human IL-17A cytokine to recombinant IL-17RA. Serially diluted ARS proteins in PBSTB buffer competed with 10 nM IL-17A for binding to *E. coli*-produced IL-17RA. Bound IL-17A was detected with anti-IL-17A polyclonal antibody in combination with secondary anti-IgG-HRP conjugate.

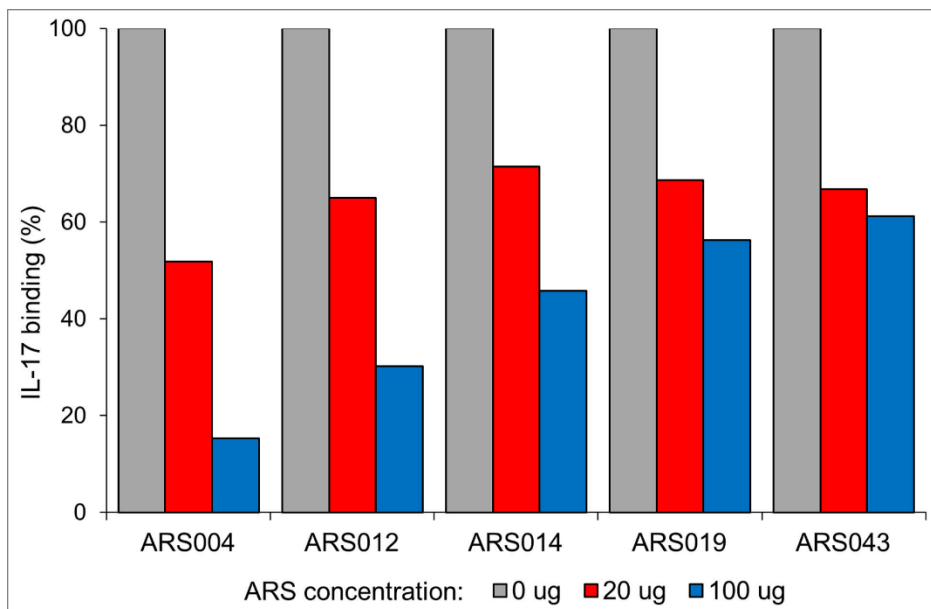

**Figure S5.** ARS ligands inhibit binding of IL-17 to THP-1 cells. THP-1 cells ( $2 \times 10^5$ ) expressing IL-17RA were pre-incubated without or with two different concentrations (20 and 100  $\mu\text{g/ml}$ ) of particular ARS proteins (30 min at  $4^\circ\text{C}$ ) and incubated with 10  $\mu\text{g/ml}$  of IL-17 (30 min at  $4^\circ\text{C}$ ). After washing, the surface-bound IL-17 was stained with anti-IL-17 rabbit antibody (30 min at  $4^\circ$ ), washed and after the incubation with a Cy5-labeled goat anti-rabbit IgG (30 min at  $4^\circ\text{C}$ ) analyzed by flow cytometry. Binding of IL-17 to ARS-untreated THP-1 cells was taken as 100%.

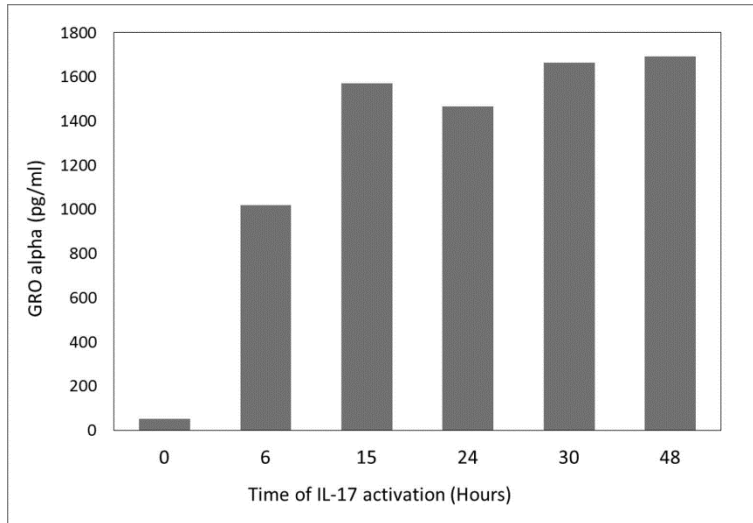

**Figure S6.** Secretion of Gro- $\alpha$  by CCD-1070Sk skin fibroblasts upon stimulation by IL-17A. Cells were stimulated by 20 ng/ml human IL-17A cytokine and after cultivation for 6, 15, 24, 30 or 48 hours, cell supernatants were collected and the levels of Gro- $\alpha$  were measured by ELISA.
